# Supplementary material
Source: publisher figshare collection journal article supplement (https://tandf.figshare.com/articles/dataset/_/4028949)
Supplement: Supplementary file 1 [file 1]

Archive with 11 entries (11 files):
- raij_a_1235151_sm1589.pdf
- raij_a_1235151_sm1585.pdf
- raij_a_1235151_sm1582.pdf
- raij_a_1235151_sm1579.pdf
- raij_a_1235151_sm1576.pdf
- raij_a_1235151_sm1565.pdf
- raij_a_1235151_sm1500.pdf
- raij_a_1235151_sm1488.jpg
- raij_a_1235151_sm1482.jpg
- raij_a_1235151_sm1374.jpg
- raij_a_1235151_sm1347.jpg
