# Supplementary material
Source: publisher figshare collection journal article supplement (https://tandf.figshare.com/articles/dataset/_/4028949)

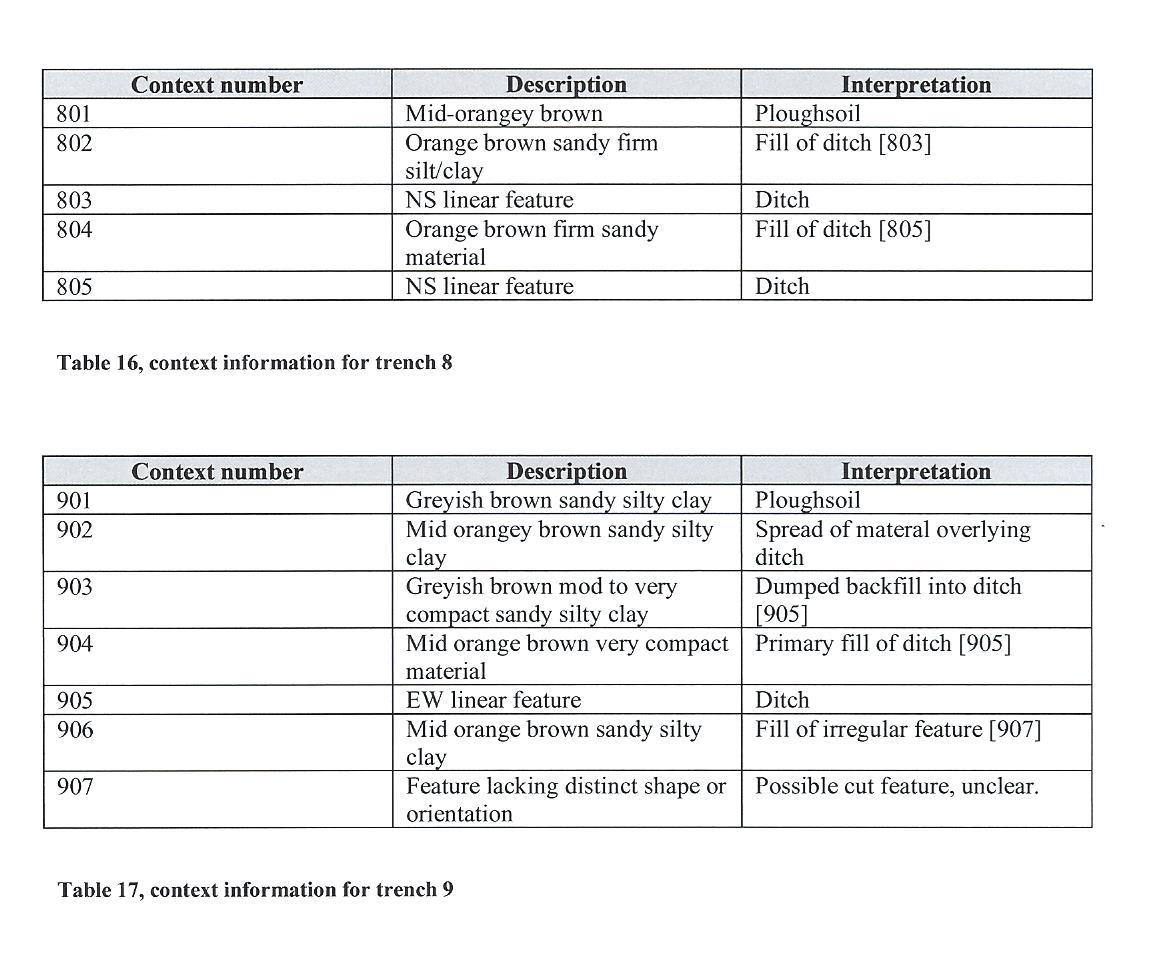

Supplement: Supplementary file 1 [file 1 › raij_a_1235151_sm1488.jpg]

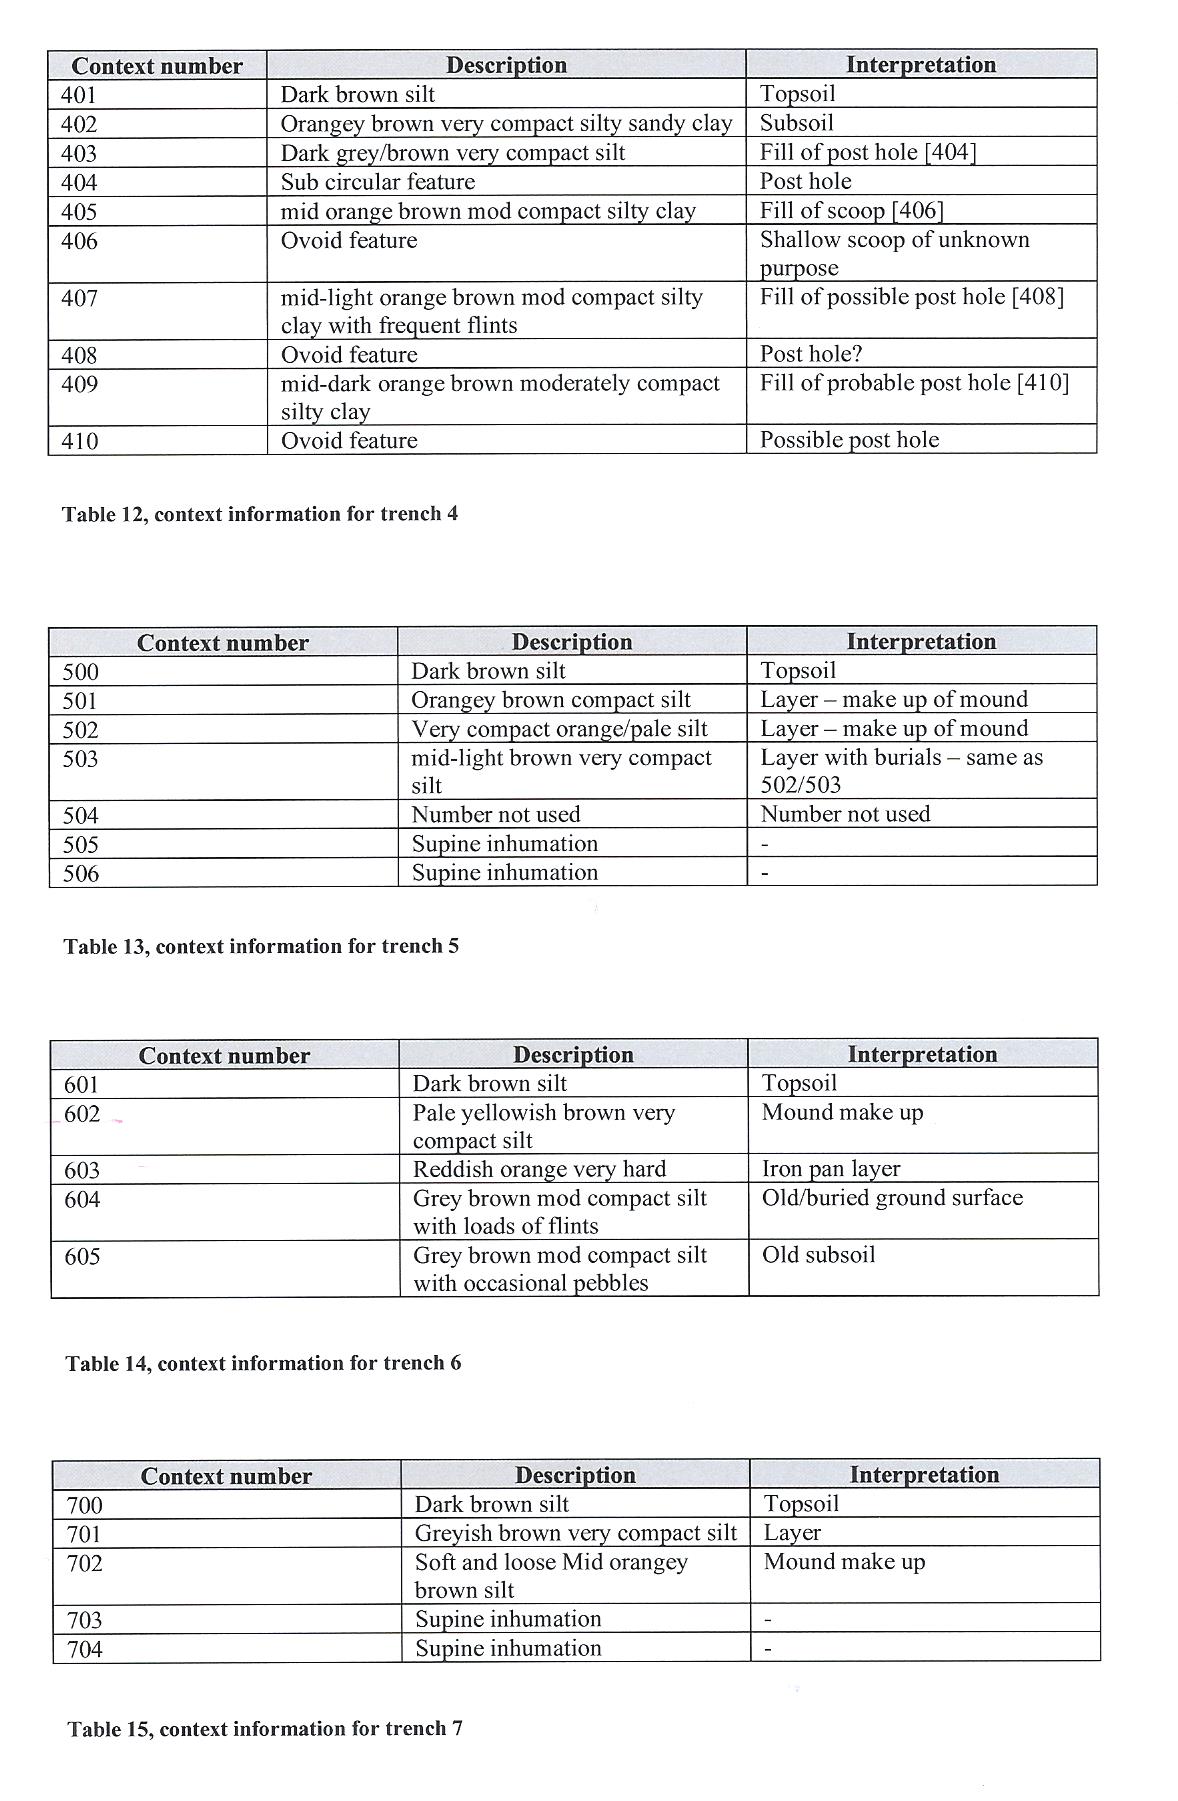

Supplement: Supplementary file 1 [file 1 › raij_a_1235151_sm1482.jpg]

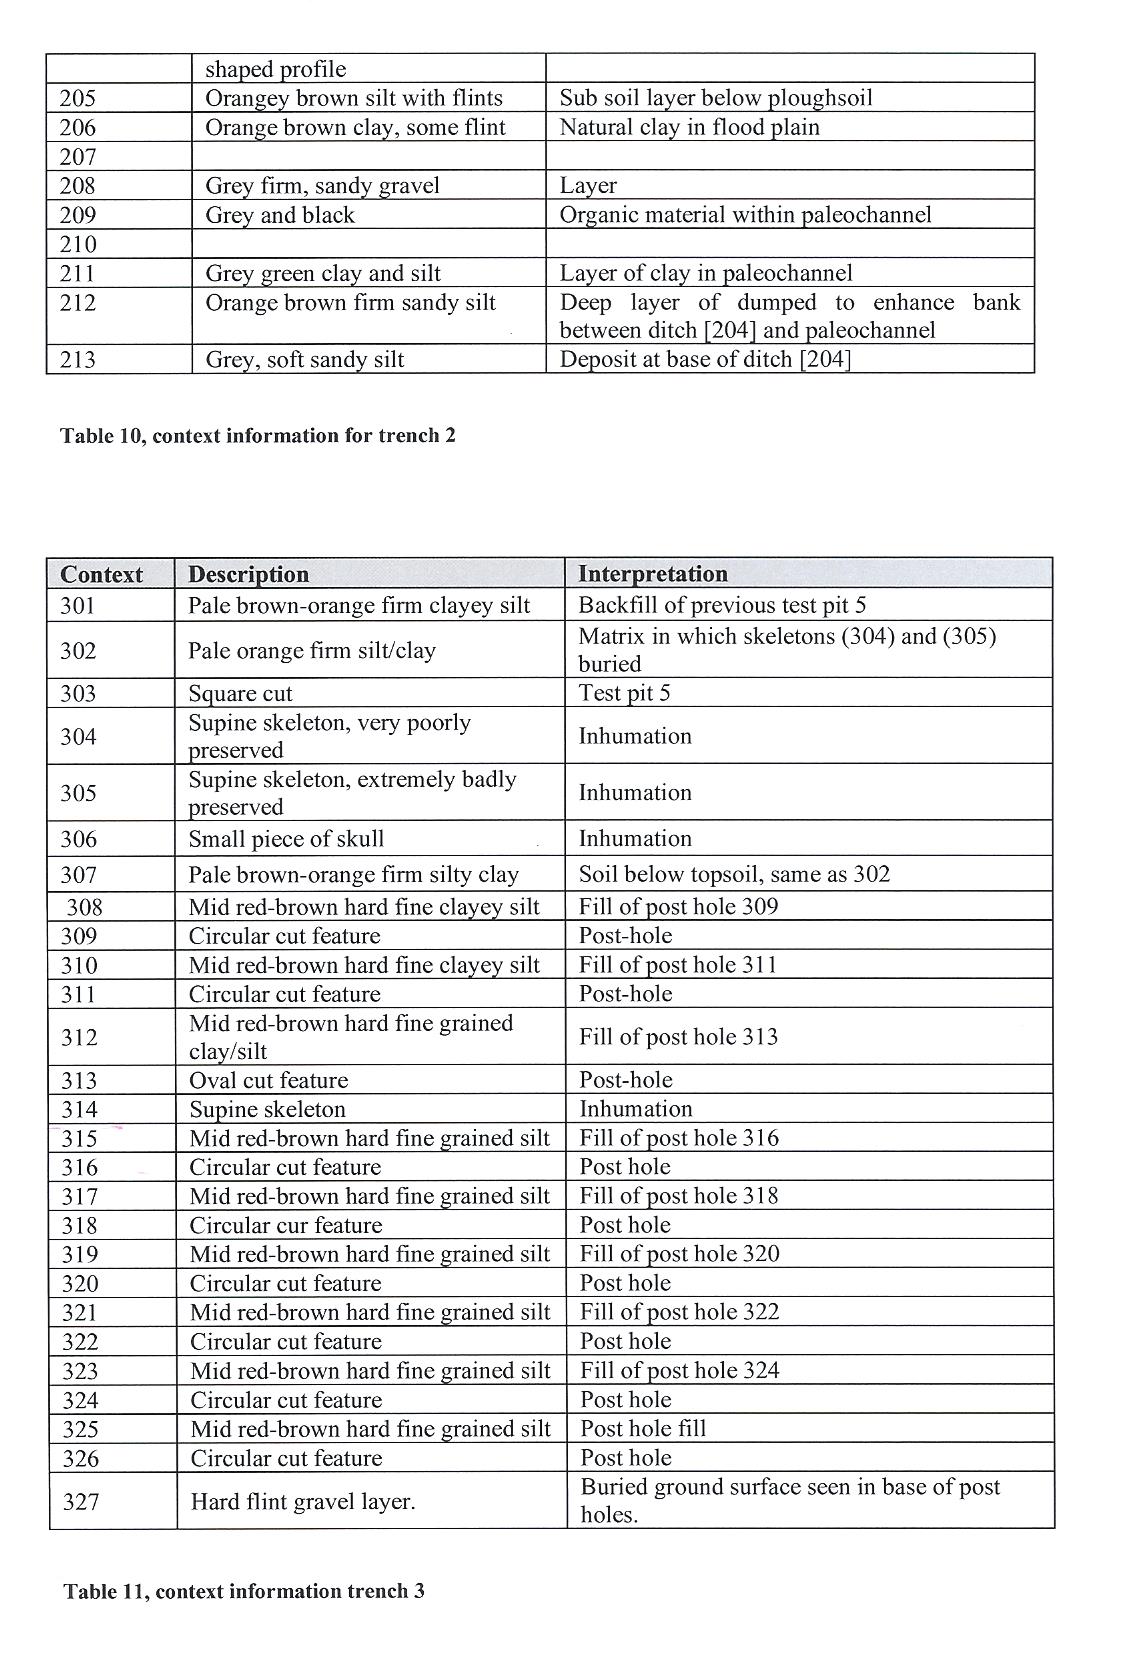

Supplement: Supplementary file 1 [file 1 › raij_a_1235151_sm1374.jpg]

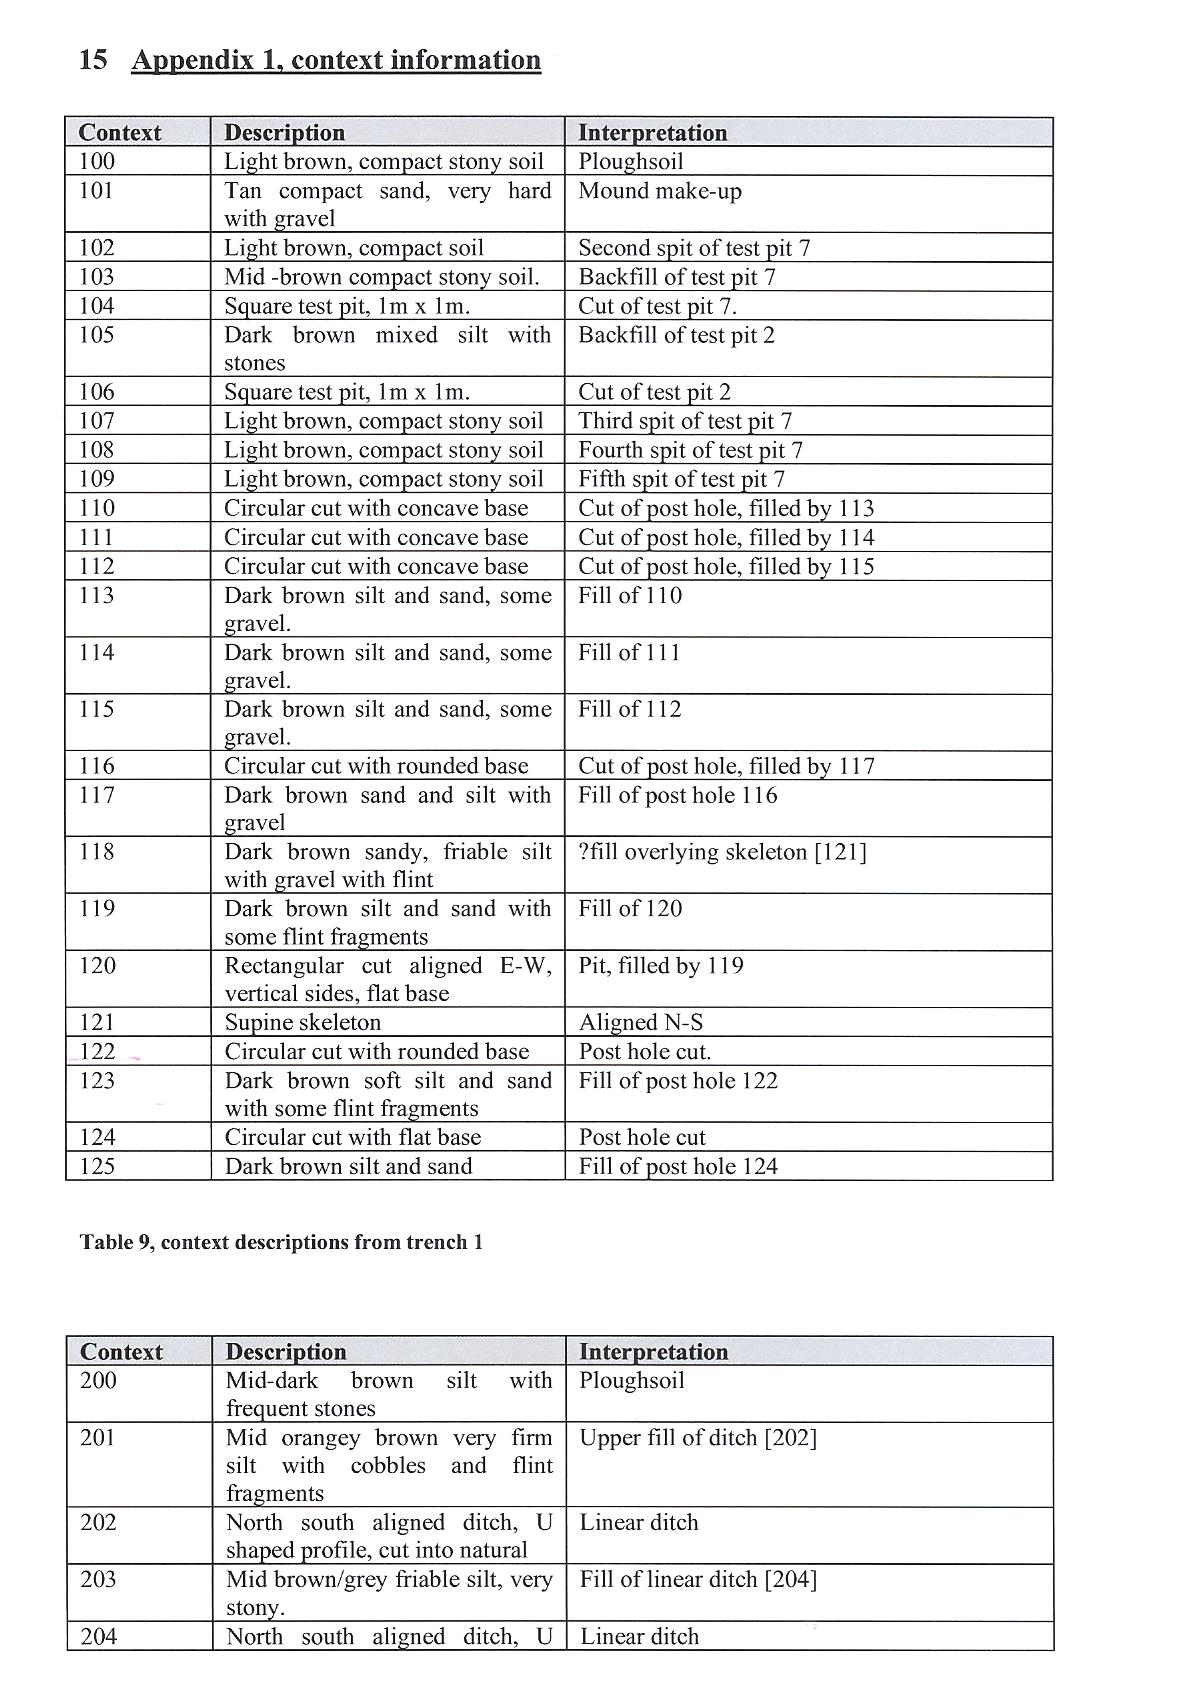

Supplement: Supplementary file 1 [file 1 › raij_a_1235151_sm1347.jpg]
